# INFOGRAPHICS IN ANESTHESIOLOGY

Complex Information for Anesthesiologists Presented Quickly and Clearly

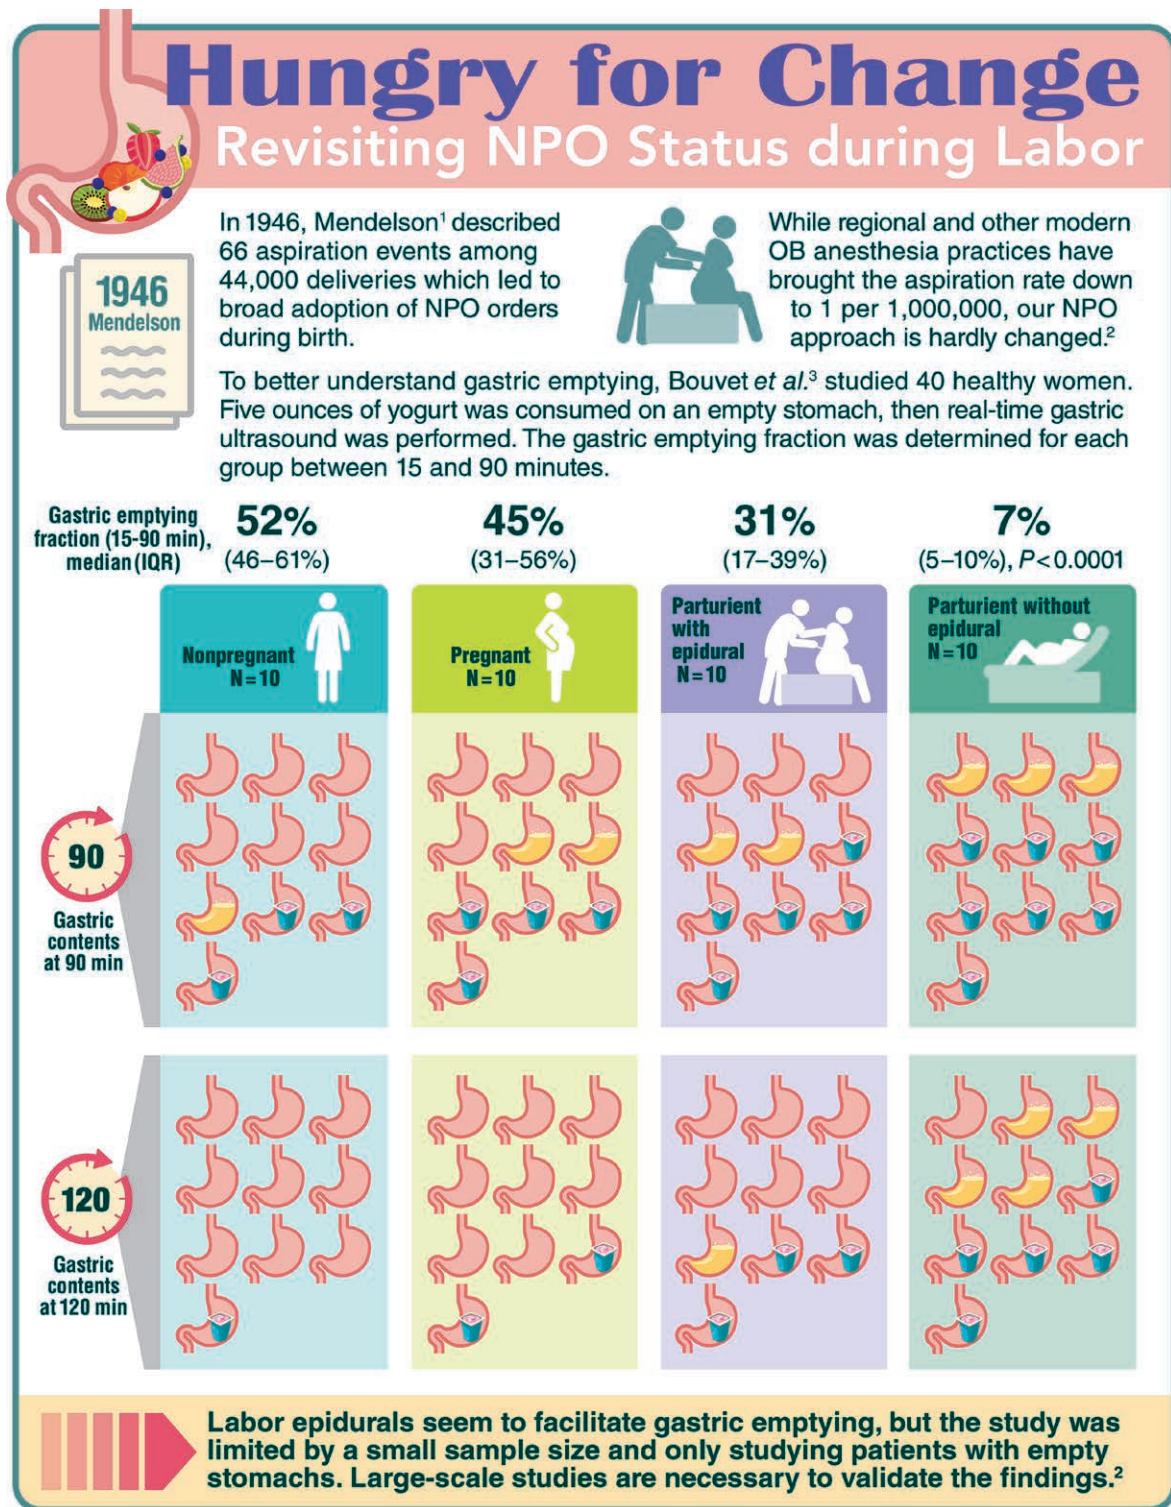

Downloaded from <http://esa2.silverchair.com/anesthesiology/article-pdf/136/4/A17603829/20220400-0-00005.pdf> by guest on 17 April 2024

IQR, interquartile range; NPO, nil per os.

Infographic created by Jonathan P. Wanderer, Vanderbilt University Medical Center, and James P. Rathmell, Brigham and Women's Health Care/Harvard Medical School. Illustration by Annemarie Johnson, Vivo Visuals Studio. Address correspondence to Dr. Wanderer: [jon.wanderer@vmc.org](mailto:jon.wanderer@vmc.org).

1. Mendelson CL: The aspiration of stomach contents into the lungs during obstetric anesthesia. *Am J Obstet Gynecol* 1946; 52:191-205
2. Palmer CM, Jiang Y: Limiting oral intake during labor: Do we have it right? *Anesthesiology* 2022; 136:528-30
3. Bouvet L, Schulz T, Piana F, Desgranges F-P, Chassard D: Pregnancy and labor epidural effects on gastric emptying: A prospective comparative study. *Anesthesiology* 2022; 136:542-50
